# Supplementary material for: Effectiveness of a hospital-initiated smoking cessation programme: 2-year health and healthcare outcomes
Source: PubMed Central journal article supplement — Tob Control. 2016 May 25;26(3):293–9. doi: 10.1136/tobaccocontrol-2015-052728 (PMC5543264; doi:10.1136/tobaccocontrol-2015-052728), 2016-05-25
Supplement: tobaccocontrol-2015-052728supp002.pdf [file tobaccocontrol-2015-052728supp002.pdf]

**Table S1.** Covariates obtained through data linkage, their descriptions, and sources

| Variable                                            | Description                                                                                                                                                                                       | Scale                                                                                                                | Source                                                                                        |
|-----------------------------------------------------|---------------------------------------------------------------------------------------------------------------------------------------------------------------------------------------------------|----------------------------------------------------------------------------------------------------------------------|-----------------------------------------------------------------------------------------------|
| <i>Income quintile</i>                              | A measure of socio-economic status (SES)                                                                                                                                                          | 1 = least affluent<br>5 = most affluent                                                                              | Statistics Canada Postal Code Conversion File <sup>1</sup>                                    |
| <i>Resource Utilization Band (RUB) score</i>        | A ranking system of a person's overall morbidity, taking into account all diagnoses ascribed to them during medical visits and hospitalizations in the year before their index event              | 0=non-user<br>1=healthy user<br>2=low morbidity<br>3=moderate morbidity<br>4=high morbidity<br>5=very high morbidity | Johns Hopkins Adjusted Clinical Group® Case Mix System, Version 9.0                           |
| <i>Rurality Index for Ontario (RIO) score</i>       | Classifies the degree of rurality of each patient's community taking into account community population, population density, and time to travel to basic and advanced health care referral centres | 0=most urban<br>100=most rural                                                                                       | Ontario Medical Association and Ministry of Health and Long Term Care <sup>2</sup>            |
| <i>History of acute myocardial infarction (AMI)</i> | Whether or not the patient had ever been admitted to hospital for ICD-9 code '410' or ICD-10 codes 'I21' or 'I22'                                                                                 | n/a                                                                                                                  | Canadian Institutes of Health Information Discharge Abstract Database (CIHI-DAD) <sup>3</sup> |
| <i>History of asthma</i>                            | Whether or not the patient had been registered as a prevalent case                                                                                                                                | n/a                                                                                                                  | ICES-derived ASTHMA database <sup>4</sup>                                                     |
| <i>History of recent cancer</i>                     | Whether or not the patient had been registered as an incident case in the 10 years prior to their index hospitalization                                                                           | n/a                                                                                                                  | Ontario Cancer Registry (OCR) <sup>5</sup>                                                    |
| <i>Diagnosis of chronic obstructive pulmonary</i>   | Whether or not the patient had been registered as a prevalent case                                                                                                                                | n/a                                                                                                                  | ICES-derived COPD database <sup>4</sup>                                                       |

|                                                             |                                                                                                                                            |     |                                                     |
|-------------------------------------------------------------|--------------------------------------------------------------------------------------------------------------------------------------------|-----|-----------------------------------------------------|
| <i>disease (COPD)</i>                                       |                                                                                                                                            |     |                                                     |
| <i>Diagnosis of congestive heart failure (CHF)</i>          | Whether or not the patient had been registered as a prevalent case                                                                         | n/a | ICES-derived CHF database <sup>4</sup>              |
| <i>Diagnosis of diabetes</i>                                | Whether or not the patient had been registered as a prevalent case                                                                         | n/a | ICES-derived Ontario Diabetes Database <sup>4</sup> |
| <i>Diagnosis of hypertension</i>                            | Whether or not the patient had been entered as a diagnosed case                                                                            | n/a | Ontario Hypertension Database <sup>4</sup>          |
| <i>History of mental illness</i>                            | Whether or not the patient had ever been admitted to hospital for ICD-9 codes 295-297, 300-302, 306-311 or ICD-10 codes F20-F49 or F60-F69 | n/a | CIHI-DAD <sup>3</sup>                               |
| <i>History of stroke or transient ischemic attack (TIA)</i> | Whether or not the patient had been registered as an incident case                                                                         | n/a | Registry of Canadian Stroke Network <sup>4</sup>    |

## TABLE S2 REFERENCES

- 1 The Postal Code Conversion File (PCCF) Reference Guide. Ottawa: Statistics Canada, Minister of Industry, 2011. [www.statcan.gc.ca/pub/92-153-g/92-153-g2011002-eng.pdf](http://www.statcan.gc.ca/pub/92-153-g/92-153-g2011002-eng.pdf) (accessed August 2014).
- 2 Kralj B. Measuring Rurality - RIO2008\_Basic: Methodology and Results. Ontario Medical Association and the Ontario Ministry of Health and Long Term Care, 2009. [www.oma.org/Resources/Documents/2008RIO-FullTechnicalPaper.pdf](http://www.oma.org/Resources/Documents/2008RIO-FullTechnicalPaper.pdf) (accessed July, 2012).
- 3 DAD Abstracting Manual. Ottawa: Canadian Institute for Health Information, 2009. [www.cihi.ca/CIHI-ext-portal/pdf/internet/dad\\_data\\_elements\\_2009\\_2010\\_en](http://www.cihi.ca/CIHI-ext-portal/pdf/internet/dad_data_elements_2009_2010_en) (accessed July, 2012).
- 4 ICES Data Dictionary: Data Repository. Toronto: Institute for Clinical Evaluative Sciences, 2014. [datadictionary.ices.on.ca/Applications/DataDictionary/Default.aspx](http://datadictionary.ices.on.ca/Applications/DataDictionary/Default.aspx) (accessed November, 2014).
- 5 Ontario Cancer Registry. Toronto, ON: Cancer Care Ontario,, 2012. [www.cancercare.on.ca/ocr/](http://www.cancercare.on.ca/ocr/) (accessed July, 2012).
