# Supplementary material for: Effectiveness of a hospital-initiated smoking cessation programme: 2-year health and healthcare outcomes
Source: PubMed Central journal article supplement — Tob Control. 2016 May 25;26(3):293–9. doi: 10.1136/tobaccocontrol-2015-052728 (PMC5543264; doi:10.1136/tobaccocontrol-2015-052728), 2016-05-25
Supplement: tobaccocontrol-2015-052728supp003.pdf [file tobaccocontrol-2015-052728supp003.pdf]

**Table S2.** Characteristics of non-smoking patients at time of index event (non-smokers)

|                                              | Control<br>(n=2009) | Intervention<br>(n=1529) | <i>p</i> -value |
|----------------------------------------------|---------------------|--------------------------|-----------------|
| Age, mean (SD)                               | 64.0 (19.6)         | 64.9 (20.4)              | .18             |
| Male sex, n (%)                              | 861 (42.9)          | 597 (39.0)               | .02             |
| Low SES (lowest two income quintiles), n (%) | 754 (37.5)          | 562 (36.8)               | .42             |
| Smokes > 20 cpd, n (%)                       | n/a                 | n/a                      |                 |
| Rurality (RIO) score, mean (SD)              | 16.4 (21.1)         | 17.0 (20.3)              | .36             |
| High overall morbidity (RUB score >3), n (%) | 1683 (83.8)         | 1290 (84.4)              | .77             |
| History of AMI, n (%)                        | 219 (10.9)          | 131 (8.6)                | .02             |
| Asthma, n (%)                                | 342 (17.0)          | 257 (16.8)               | .87             |
| Cancer, n (%)                                | 261 (11.3)          | 175 (11.7)               | .70             |
| CHF, n (%)                                   | 430 (21.4)          | 347 (22.7)               | .35             |
| COPD, n (%)                                  | 490 (24.4)          | 412 (26.9)               | .08             |
| Diabetes, n (%)                              | 535 (26.6)          | 411 (26.9)               | .87             |
| Hypertension, n (%)                          | 1203 (59.9)         | 903 (59.1)               | .62             |
| History of mental illness, n (%)             | 97 (4.8)            | 80 (5.2)                 | .59             |
| History of Stroke or TIA, n (%)              | 278 (13.8)          | 229 (15.0)               | .34             |

AMI=Acute Myocardial Infarction; CHF=Heart Failure; CPD=Cigarettes per day; COPD=Chronic Obstructive Pulmonary Disease; n=Number; RIO=Rurality Index of Ontario; RUB=Resource Utilization Band; SD=Standard Deviation; SES=Socio-economic Status; TIA=Transient Ischemic Attack
